# Supplementary material for: A Polymeric Bilayer Multi-Legged Soft Millirobot with Dual Actuation and Humidity Sensing
Source: MDPI journal article supplement (doi:10.3390/s21061972), 2021-03-11
Supplement: s1 [file s1]

# A Polymeric Bilayer Multi-Legged Soft Millirobot with Dual Actuation and Humidity Sensing

Shidai Tian <sup>1,2,†</sup>, Shijie Li <sup>1,2,†</sup>, Yijie Hu <sup>1,2</sup>, Wei Wang <sup>2,3</sup>, Aifang Yu <sup>1,2,3,\*</sup>, Lingyu Wan <sup>1,\*</sup> and Junyi Zhai <sup>1,2,3,\*</sup>

<sup>1</sup> Center on Nanoenergy Research, School of Physical Science and Technology, Guangxi University, Nanning 530004, China; tianshidai@binn.cas.cn (S.T.); lishijie@binn.cas.cn (S.L.); huyijie@binn.cas.cn (Y.H.)

<sup>2</sup> CAS Center for Excellence in Nanoscience, Beijing Key Laboratory of Micro-nano Energy and Sensor, Beijing Institute of Nanoenergy and Nanosystems, Chinese Academy of Sciences, Beijing 100083, China; weiwang@binn.cas.cn

<sup>3</sup> College of Nanoscience and Technology, University of Chinese Academy of Science, Beijing 100049, China

\* Correspondence: yuaifang@binn.cas.cn (A.Y.); LYW2017@gxu.edu.cn (L.W.); jyzhai@binn.cas.cn (J.Z.)

† These authors contributed equally to this work.

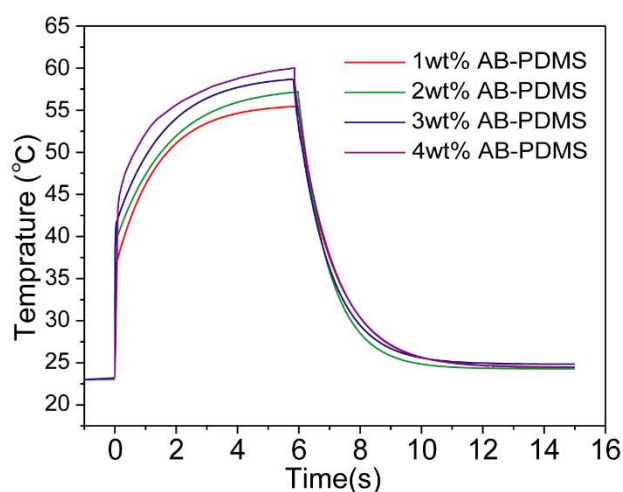

Figure S1. Temperature change of the actuator working in water.

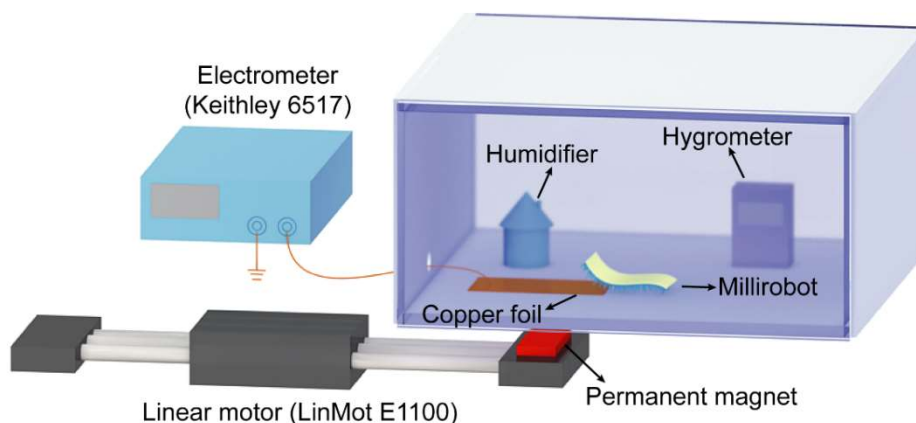

Figure S2. Schematic of the millirobot-TENG measurement set-ups.

---

### Supplementary Movies

**Movie S1.** Real-time temperature changes of the polymeric bilayer platform with 4wt% AB concentration under infrared light irradiation (90mW cm<sup>-2</sup>).

**Movie S2.** Locomotion of the multi-legged millirobot in the light-driven mode, including a plane motion, forward, up-hill, swimming on the water and turning around.

**Movie S3.** Motion of the multi-legged millirobot in the magnetic-induced mode, including a plane motion, climbing a slope, walking in the water.

**Movie S4.** Load capacity test of the multi-legged millirobot, including loading a 30mg pill (10 times heavier of its own weight) in the light-driven mode and loading a 60mg tablet (20 times heavier of its own weight) in the magnetic-induced mode.

**Movie S5.** Humidity signals harvested from millirobot-TENG under stimulation of a magnetic field and execute the same compulsory exercise in the light-driven mode.
